# Supplementary material
Source: HighWire-hosted journal article supplement (https://sti.bmj.com/content/99/6/420)
Supplement: inline-supplementary-material-2 [file inline-supplementary-material-2.pdf]

## SEARCH STRING STRATEGY

### Pubmed

((chlamydia trachomatis[Text Word]) AND/OR (neisseria gonorrhoeae[Text Word]) OR (ct/gc[Text Word])) AND ((self-testing[Text Word] OR self testing[Text Word] OR self-sampling[Text Word] OR self sampling[Text Word])). Filters applied: from 2000/1/1 - 2023/01/6.

### LILACS

(chlamydia trachomatis and neisseria gonorrhoeae or ctgc) AND (self-testing or self testing or self-sampling or self sampling). Filters applied: from 2000/1/1 - 2023/01/6.

### Embase search history

Libraries: Embase <1996 to 2021 Week 47> and Embase Classic+Embase <1947 to 2021 Week 47>

- 1 ((chlamydia trachomatis and neisseria gonorrhoeae) or ctgc).mp. [mp=title, abstract, heading word, drug trade name, original title, device manufacturer, drug manufacturer, device trade name, keyword heading word, floating subheading word, candidate term word] 5566
- 2 limit 1 to yr="2000 -Current" 4245
- 3 (self-testing or self testing or self-sampling or self sampling).mp. [mp=title, abstract, heading word, drug trade name, original title, device manufacturer, drug manufacturer, device trade name, keyword heading word, floating subheading word, candidate term word] 3113
- 4 limit 3 to yr="2000 -Current" 2975
- 5 2 and 4 44
