# Supplementary material
Source: HighWire-hosted journal article supplement (https://sti.bmj.com/content/99/6/420)
Supplement: inline-supplementary-material-7 [file inline-supplementary-material-7.pdf]

**Supplementary Table 4. Sensitivity, Specificity and DOR of *Chlamydia Trachomatis* and *Neisseria gonorrhoea* Self-Sampling Based Tests by Country Type and Sampling Sites for High-Income Countries Only with Associated 95% CIs,  $i^2$  Metric, and p-values. Significant Values are Bolded.**

|                                     |                         | <b>Sensitivity</b><br>[95% CIs] | <b>p-value</b> | <b>Specificity</b><br>[95% CIs] | <b>p-value</b> | <b>DOR</b><br>[95% CIs] | <b><math>I^2</math></b> |
|-------------------------------------|-------------------------|---------------------------------|----------------|---------------------------------|----------------|-------------------------|-------------------------|
| <b><i>Chlamydia trachomatis</i></b> | High Income             | 91.6<br>[84.9–95.5]             | <0.001         | 99.2<br>[98.8–99.4]             | 0.008          | 1390<br>[551–2940]      | 87.0                    |
|                                     | Vaginal <sup>1</sup>    | 86.0<br>[76.6–92.1]             | Ref            | 99.7<br>[97.6–100]              | Ref            | 4060<br>[165–21400]     | 84.2                    |
|                                     | Pharyngeal <sup>1</sup> | 92.5<br>[86.5–95.9]             | 0.79           | 99.7<br>[99.5–99.8]             | 0.57           | 4550<br>[1710–9880]     | 0.0                     |
|                                     | Rectal <sup>1</sup>     | 93.1<br>[87.8–96.2]             | 0.34           | 99.4<br>[98.8–99.7]             | 0.81           | 2490<br>[638–6770]      | 79.0                    |
|                                     | Low Income              | 70.7<br>[45.7–87.4]             | Ref            | 98.5<br>[97.9–98.9]             | Ref            | 181<br>[56–442]         | 81.9                    |
| <b><i>Neisseria gonorrhoea</i></b>  | High Income             | 92.9<br>[88.1–95.9]             | <0.001         | 97.7<br>[96.9–98.3]             | 0.25           | 573<br>[307–980]        | 75.2                    |
|                                     | Vaginal <sup>1</sup>    | 86.2<br>[76.0–92.5]             | Ref            | 99.8<br>[98.6–100]              | Ref            | 6740<br>[353–33400]     | 70.8                    |
|                                     | Pharyngeal <sup>1</sup> | 94.3<br>[89.6–96.9]             | 0.07           | 99.3<br>[97.1, 99.8]            | 0.20           | 3370<br>[422–12600]     | 70.8                    |
|                                     | Rectal <sup>1</sup>     | 91.6<br>[86.0–95.1]             | 0.27           | 99.2<br>[98.4–99.6]             | 0.19           | 1620<br>[426–4340]      | 63.8                    |
|                                     | Low Income              | 77.4<br>[61.4–88.0]             | Ref            | 98.8 [97.9–99.3]                | Ref            | 309<br>[114–682]        | 74.8                    |

<sup>1</sup> values are for studies from high-income countries only
