# Supplementary material
Source: HighWire-hosted journal article supplement (https://sti.bmj.com/content/99/6/420)

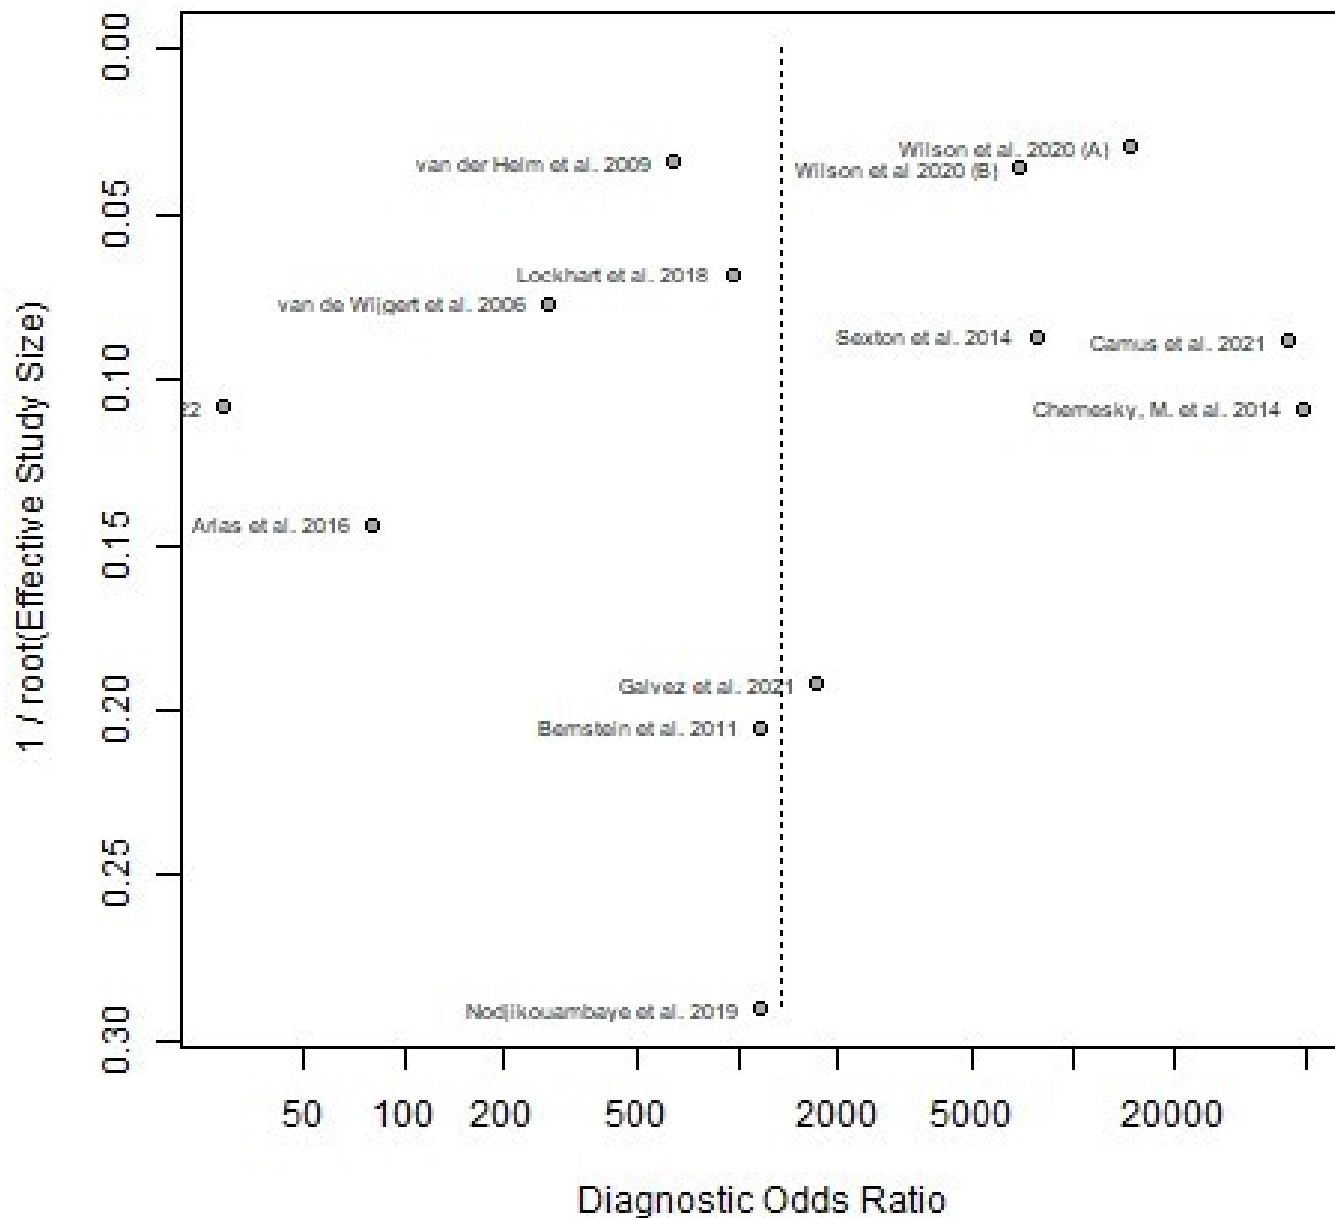

Supplement: inline-supplementary-material-6 [file inline-supplementary-material-6.pdf]
